# Supplementary material for: Chemoselective deprotection and deprotection with concomitant reduction of 1,3-dioxolanes, acetals and ketals using nickel boride
Source: Royal Society of Chemistry journal article supplement (doi:10.1039/c4ra15404e), 2015-01-01
Supplement: c4ra15404e1.pdf [file c4ra15404e1.pdf]

## Supporting Information

### **Chemoselective Deprotection and Deprotection with concomitant reduction on 1,3-Dioxolanes, Acetals and Ketals using Nickel Boride**

**Jitender M. Khurana,\* Kiran Dawra and Purnima Sharma**

Department of Chemistry, University of Delhi, Delhi-110007, India

\*Email: [jmkhurana@chemistry.du.ac.in](mailto:jmkhurana@chemistry.du.ac.in); Fax: 91-11-27666605

Table S1: List of melting points of **II**

| Entry | <b>II</b>                       | Physical State | M.p/°C   |                         |
|-------|---------------------------------|----------------|----------|-------------------------|
|       |                                 |                | Observed | Literature <sup>a</sup> |
| 1.    | 4-Methylbenzaldehyde (IIa)      | Liquid         | -        | -                       |
| 2.    | 2-Naphthaldehyde (IIb)          | Solid          | 60       | 59-62                   |
| 3.    | 1- Naphthaldehyde (IIc)         | Liquid         | -        | -                       |
| 4.    | 4-Methoxybenzaldehyde (IId)     | Liquid         | -        | -                       |
| 5.    | Piperonal (IIe)                 | Solid          | 36       | 35-37                   |
| 6.    | 3,4-Dimethoxybenzaldehyde (IIf) | Solid          | 42       | 42-43                   |
| 7.    | 4-Chlorobenzaldehyde (IIg)      | Solid          | 50       | 47-50                   |
| 8.    | 4-Bromobenzaldehyde (IIh)       | Solid          | 58       | 55-58                   |
| 9.    | 2- Chlorobenzaldehyde (IIi)     | Liquid         | -        | -                       |
| 10.   | 3- Chlorobenzaldehyde (IIj)     | Liquid         | -        | -                       |
| 11.   | Acetophenone (IIk)              | Liquid         | -        | -                       |
| 12.   | Butyrophenone (III)             | Liquid         | -        | -                       |
| 13.   | 4-Methylacetophenone (IIIm)     | Liquid         | -        | -                       |
| 14.   | 4-Methoxyacetophenone (IIIn)    | Liquid         | -        | -                       |
| 15.   | Propiophenone (IIo)             | Liquid         | -        | -                       |
| 16.   | Fluorenone (IIp)                | Solid          | 80       | 80-82                   |
| 17.   | 4-Chloroacetophenone (IIq)      | Liquid         | -        | -                       |
| 18.   | Octane-2-one (IIr)              | Liquid         | -        | -                       |

**<sup>a</sup>References**

- (a) Handbuch Der Organischem, Beilstein, **7**, 498.  
(b) J.J. Eisch, J.E. Galle, A. Piotrowski, M.R. Tsai, *J. Org. Chem.*, **47**, 5051.
- Handbuch Der Organischem, Beilstein, **8**, 255.
- Handbuch Der Organischem, Beilstein, **19**, 115.
- Handbuch Der Organischem, Beilstein, **7**, 235.
